# Supplementary material for: Antihypertensive medication use during pregnancy in a real-world cohort of patients diagnosed with a hypertensive disorder of pregnancy
Source: PubMed Central journal article supplement (PMC10360165; doi:10.3389/fcvm.2023.1225251), 2023-07-07
Supplement: Datasheet1.pdf [file Datasheet1.pdf]

**Supplemental Figure 1.** Summary of the study population included in the analysis. Flow diagram summarizing the inclusion and exclusion criteria used to identify the study population.

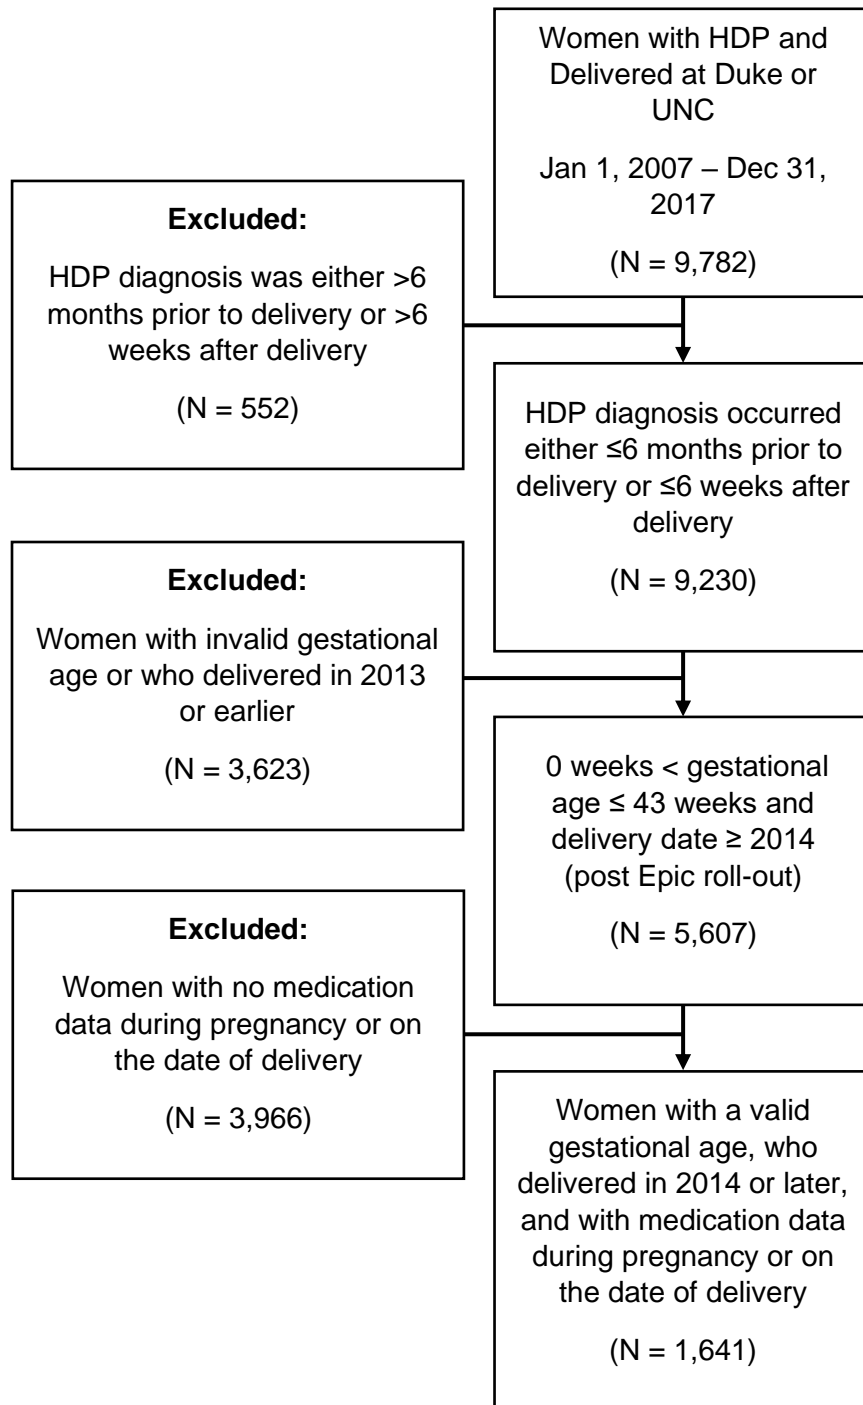

**Supplemental Figure 2:** Sensitivity analysis of medication use in patients who delivered in 2016 and 2017. (A) The proportion of patients who delivered in 2016-2017 (N=1079) that were treated with an antihypertensive agent stratified by HDP type. (B) The frequency of antihypertensive medication classes used among 2016-17 patients treated for HDP (N = 813) stratified by HDP type.

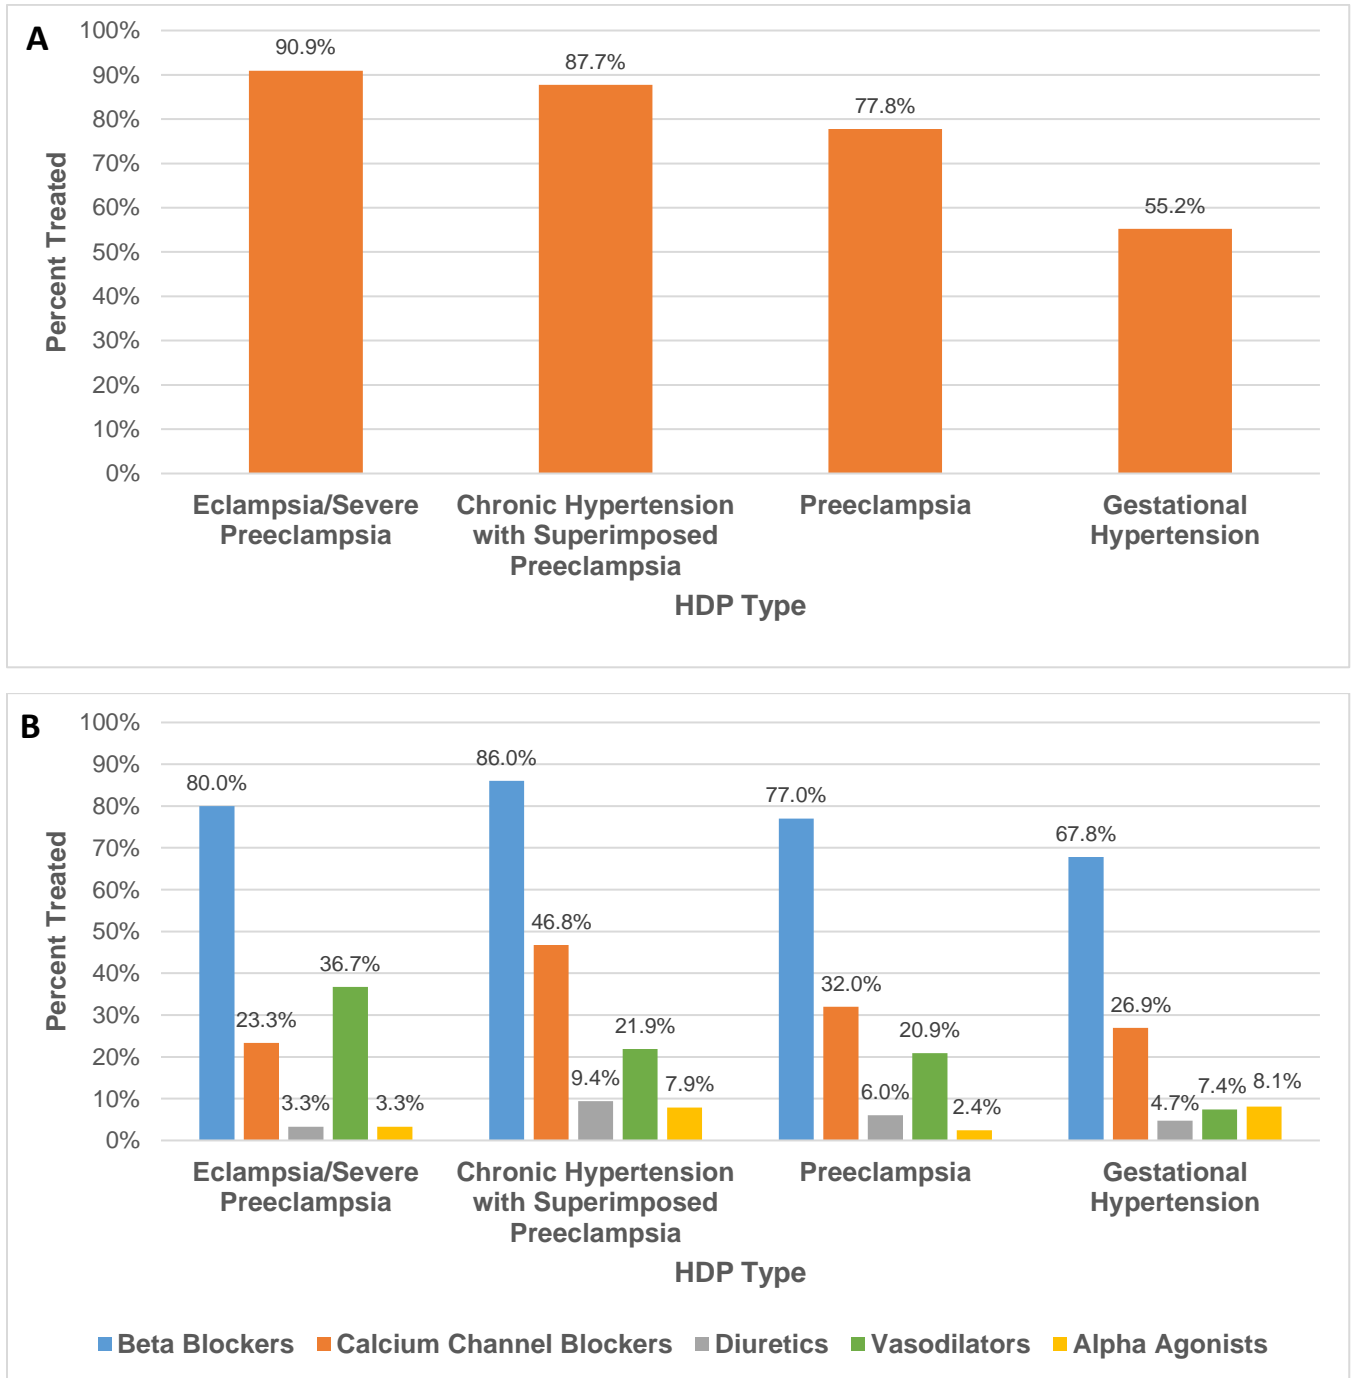

**Supplemental Table 1:** Demographic and clinical factors across treatment with a beta blocker (BB)

| Demographic Characteristics                         | BB Yes<br>(N = 1011) | BB No<br>(N = 265) | Unadjusted<br>OR | 95% CI     | P value | Adjusted<br>OR ^ | 95% CI      | P Value |
|-----------------------------------------------------|----------------------|--------------------|------------------|------------|---------|------------------|-------------|---------|
| <b>Age (years)</b>                                  | 30.5 ± 6.7           | 29.9 ± 6.3         | 1.02             | 0.99, 1.04 | 0.145   | 1.02             | 0.99, 1.05  | 0.145   |
| <b>Black Race</b>                                   | 432 (42.7%)          | 102 (38.5%)        | 1.19             | 0.90, 1.57 | 0.213   | 1.16             | 0.81, 1.64  | 0.419   |
| <b>Hispanic Ethnicity</b>                           | 149 (14.7%)          | 36 (13.6%)         | 1.10             | 0.74, 1.63 | 0.635   | 1.25             | 0.74, 2.11  | 0.411   |
| <b>Year of Delivery</b>                             |                      |                    |                  |            |         |                  |             |         |
| 2014-2015                                           | 374 (37.0%)          | 89 (33.6%)         | <i>Reference</i> |            |         | <i>Reference</i> |             |         |
| 2016-2017                                           | 637 (63.0%)          | 176 (66.4%)        | 0.86             | 0.65, 1.15 | 0.304   | 0.69             | 0.44, 1.10  | 0.120   |
| <b>Site of Delivery</b>                             |                      |                    |                  |            |         |                  |             |         |
| Site A                                              | 451 (44.6%)          | 140 (52.8%)        | <i>Reference</i> |            |         | <i>Reference</i> |             |         |
| Site B                                              | 560 (55.4%)          | 125 (47.2%)        | 1.39             | 1.06, 1.82 | 0.017   | 1.31             | 0.94, 1.83  | 0.105   |
| <b>Primary Payor</b>                                |                      |                    |                  |            |         |                  |             |         |
| Government                                          | 513 (50.7%)          | 127 (47.9%)        | <i>Reference</i> |            |         | <i>Reference</i> |             |         |
| Commercial                                          | 394 (39.0%)          | 121 (45.7%)        | 0.81             | 0.61, 1.07 | 0.133   | 0.87             | 0.61, 1.24  | 0.437   |
| Other (including self-pay)                          | 104 (10.3%)          | 17 (6.4%)          | 1.51             | 0.88, 2.62 | 0.138   | 1.51             | 0.82, 2.76  | 0.186   |
| <b>Hypertensive Disorders of Pregnancy (HDP)</b>    |                      |                    |                  |            |         |                  |             |         |
| Eclampsia/Severe preeclampsia                       | 222 (22.0%)          | 38 (14.3%)         | 2.76             | 1.78, 4.28 | <0.001  | 2.00             | 1.04, 3.82  | 0.037   |
| Chronic hypertension with superimposed preeclampsia | 299 (29.6%)          | 55 (20.8%)         | 2.57             | 1.73, 3.81 | <0.001  | 2.44             | 1.50, 3.96  | <0.001  |
| Preeclampsia                                        | 329 (32.5%)          | 96 (36.2%)         | 1.62             | 1.13, 2.31 | 0.008   | 1.55             | 1.03, 2.34  | 0.035   |
| Gestational hypertension                            | 161 (15.9%)          | 76 (28.7%)         | <i>Reference</i> |            |         | <i>Reference</i> |             |         |
| <b>Pregnancy Characteristics</b>                    |                      |                    |                  |            |         |                  |             |         |
| Gestational Onset of HDP (weeks)*                   | 34.3 ± 4.6           | 34.8 ± 5.0         | 0.98             | 0.94, 1.01 | 0.179   | 1.00             | 0.96, 1.03  | 0.892   |
| Gestational Diabetes                                | 169 (16.7%)          | 50 (18.9%)         | 0.86             | 0.61, 1.22 | 0.409   | 0.70             | 0.45, 1.10  | 0.119   |
| <b>Past Medical History</b>                         |                      |                    |                  |            |         |                  |             |         |
| Hypertension                                        | 358 (35.4%)          | 73 (27.6%)         | 1.44             | 1.07, 1.94 | 0.016   | 1.16             | 0.79, 1.71  | 0.447   |
| Type 1 DM                                           | 31 (3.1%)            | 7 (2.6%)           | 1.17             | 0.51, 2.68 | 0.718   | 0.55             | 0.19, 1.55  | 0.257   |
| Type 2 DM                                           | 94 (9.3%)            | 16 (6.0%)          | 1.60             | 0.92, 2.76 | 0.095   | 1.66             | 0.83, 3.31  | 0.149   |
| Prediabetes                                         | 42 (4.2%)            | 11 (4.2%)          | 1.00             | 0.51, 1.97 | 0.998   | 0.93             | 0.43, 2.03  | 0.861   |
| Renal Disease                                       | 24 (2.4%)            | 3 (1.1%)           | 2.12             | 0.63, 7.11 | 0.222   | 4.86             | 0.61, 38.59 | 0.135   |

\*Data only available in N = 1033. ^Adjusted analysis was conducted in the N = 1033 with gestational onset of HDP data available

**Supplemental Table 2:** Demographic and clinical factors across treatment with a calcium channel blocker (CCB)

| <b>Demographic Characteristics</b>                  | <b>CCB Yes (N = 406)</b> | <b>CCB No (N = 870)</b> | <b>Unadjusted OR</b> | <b>95% CI</b> | <b>P value</b> | <b>Adjusted OR ^</b> | <b>95% CI</b> | <b>P value</b> |
|-----------------------------------------------------|--------------------------|-------------------------|----------------------|---------------|----------------|----------------------|---------------|----------------|
| <b>Age</b>                                          | 30.9 ± 6.2               | 30.1 ± 6.8              | 1.02                 | 1.00, 1.04    | 0.045          | 1.00                 | 0.98, 1.03    | 0.684          |
| <b>Black Race</b>                                   | 206 (50.7%)              | 328 (37.7%)             | 1.70                 | 1.34, 2.16    | <0.001         | 1.42                 | 1.04, 1.94    | 0.029          |
| <b>Hispanic Ethnicity</b>                           | 47 (11.6%)               | 138 (15.9%)             | 0.69                 | 0.49, 0.99    | 0.044          | 1.13                 | 0.71, 1.81    | 0.609          |
| <b>Year of Delivery</b>                             |                          |                         |                      |               |                |                      |               |                |
| 2014-2015                                           | 117 (28.8%)              | 346 (39.8%)             | <i>Reference</i>     |               |                | <i>Reference</i>     |               |                |
| 2016-2017                                           | 289 (71.2%)              | 524 (60.2%)             | 1.63                 | 1.27, 2.10    | <0.001         | 2.45                 | 1.58, 3.80    | <0.001         |
| <b>Site of Delivery</b>                             |                          |                         |                      |               |                |                      |               |                |
| Site A                                              | 244 (60.1%)              | 347 (39.9%)             | <i>Reference</i>     |               |                | <i>Reference</i>     |               |                |
| Site B                                              | 162 (39.9%)              | 523 (60.1%)             | 0.44                 | 0.35, 0.56    | <0.001         | 0.41                 | 0.30, 0.55    | <0.001         |
| <b>Primary Payor</b>                                |                          |                         |                      |               |                |                      |               |                |
| Government                                          | 205 (50.5%)              | 435 (50.0%)             | <i>Reference</i>     |               |                | <i>Reference</i>     |               |                |
| Commercial                                          | 167 (41.1%)              | 348 (40.0%)             | 1.02                 | 0.79, 1.31    | 0.886          | 1.01                 | 0.73, 1.40    | 0.968          |
| Other (including self-pay)                          | 34 (8.4%)                | 87 (10.0%)              | 0.83                 | 0.54, 1.27    | 0.393          | 1.01                 | 0.61, 1.67    | 0.974          |
| <b>Hypertensive Disorders of Pregnancy (HDP)</b>    |                          |                         |                      |               |                |                      |               |                |
| Eclampsia/Severe preeclampsia                       | 57 (14.0%)               | 203 (23.3%)             | 0.74                 | 0.49, 1.12    | 0.155          | 0.82                 | 0.45, 1.52    | 0.532          |
| Chronic hypertension with superimposed preeclampsia | 158 (38.9%)              | 196 (22.5%)             | 2.13                 | 1.50, 3.04    | <0.001         | 1.63                 | 1.05, 2.51    | 0.028          |
| Preeclampsia                                        | 126 (31.0%)              | 299 (34.4%)             | 1.12                 | 0.78, 1.59    | 0.546          | 0.95                 | 0.63, 1.45    | 0.827          |
| Gestational hypertension                            | 65 (15.0%)               | 172 (19.8%)             | <i>Reference</i>     |               |                | <i>Reference</i>     |               |                |
| <b>Pregnancy Characteristics</b>                    |                          |                         |                      |               |                |                      |               |                |
| Gestational Onset of HDP (weeks)*                   | 33.3 ± 5.0               | 35.0 ± 4.4              | 0.93                 | 0.90, 0.96    | <0.001         | 0.92                 | 0.89, 0.95    | <0.001         |
| Gestational Diabetes                                | 86 (21.2%)               | 133 (15.3%)             | 1.49                 | 1.10, 2.01    | 0.010          | 1.20                 | 0.80, 1.81    | 0.382          |
| <b>Past Medical History</b>                         |                          |                         |                      |               |                |                      |               |                |
| Hypertension                                        | 164 (40.4%)              | 267 (30.7%)             | 1.53                 | 1.20, 1.96    | <0.001         | 1.26                 | 0.90, 1.75    | 0.180          |
| Type 1 DM                                           | 21 (5.2%)                | 17 (2.0%)               | 2.74                 | 1.43, 5.25    | 0.002          | 2.44                 | 0.99, 6.02    | 0.052          |
| Type 2 DM                                           | 45 (11.1%)               | 65 (7.5%)               | 1.54                 | 1.03, 2.30    | 0.033          | 0.96                 | 0.55, 1.66    | 0.880          |
| Prediabetes                                         | 15 (3.7%)                | 38 (4.4%)               | 0.84                 | 0.46, 1.55    | 0.575          | 0.70                 | 0.33, 1.49    | 0.354          |
| Renal Disease                                       | 20 (4.9%)                | 7 (0.80%)               | 6.39                 | 2.68, 15.23   | <0.001         | 5.84                 | 1.96, 17.39   | 0.002          |

\*Data only available in N = 1033. ^Adjusted analysis was conducted in the N = 1033 with gestational onset of HDP data available

**Supplemental Table 3: Demographic and clinical factors across treatment with a vasodilator (VD)**

| <b>Demographic Characteristics</b>                  | <b>VD Yes (N = 275)</b> | <b>VD No (N = 1001)</b> | <b>Unadjusted OR</b> | <b>95% CI</b> | <b>P value</b> | <b>Adjusted OR ^</b> | <b>95% CI</b> | <b>P value</b> |
|-----------------------------------------------------|-------------------------|-------------------------|----------------------|---------------|----------------|----------------------|---------------|----------------|
| <b>Age</b>                                          | 30.3 ± 6.6              | 30.4 ± 6.6              | 1.00                 | 0.98, 1.02    | 0.799          | 1.01                 | 0.98, 1.04    | 0.446          |
| <b>Black Race</b>                                   | 139 (50.6%)             | 395 (39.5%)             | 1.57                 | 1.20, 2.05    | 0.001          | 1.63                 | 1.13, 2.34    | 0.008          |
| <b>Hispanic Ethnicity</b>                           | 42 (15.3%)              | 143 (14.3%)             | 1.08                 | 0.74, 1.57    | 0.681          | 1.36                 | 0.82, 2.26    | 0.234          |
| <b>Year of Delivery</b>                             |                         |                         |                      |               |                |                      |               |                |
| 2014-2015                                           | 118 (42.9%)             | 345 (34.5%)             | <i>Reference</i>     |               |                | <i>Reference</i>     |               |                |
| 2016-2017                                           | 157 (57.1%)             | 656 (65.5%)             | 0.70                 | 0.53, 0.92    | 0.010          | 1.12                 | 0.70, 1.78    | 0.639          |
| <b>Site of Delivery</b>                             |                         |                         |                      |               |                |                      |               |                |
| Site A                                              | 114 (41.5%)             | 477 (47.7%)             | <i>Reference</i>     |               |                | <i>Reference</i>     |               |                |
| Site B                                              | 161 (58.6%)             | 524 (52.4%)             | 1.29                 | 0.98, 1.68    | 0.068          | 1.60                 | 1.13, 2.27    | 0.009          |
| <b>Primary Payor</b>                                |                         |                         |                      |               |                |                      |               |                |
| Government                                          | 148 (53.8%)             | 492 (49.2%)             | <i>Reference</i>     |               |                | <i>Reference</i>     |               |                |
| Commercial                                          | 94 (34.2%)              | 421 (42.1%)             | 0.74                 | 0.56, 0.99    | 0.044          | 0.92                 | 0.63, 1.34    | 0.647          |
| Other (including self-pay)                          | 33 (12.0%)              | 88 (8.8%)               | 1.25                 | 0.80, 1.94    | 0.326          | 1.48                 | 0.88, 2.46    | 0.137          |
| <b>Hypertensive Disorders of Pregnancy (HDP)</b>    |                         |                         |                      |               |                |                      |               |                |
| Eclampsia/Severe preeclampsia                       | 88 (32.0%)              | 172 (17.2%)             | 5.87                 | 3.44, 10.02   | <0.001         | 5.70                 | 2.86, 11.34   | <0.001         |
| Chronic hypertension with superimposed preeclampsia | 83 (30.2%)              | 271 (27.1%)             | 3.51                 | 2.07, 5.97    | <0.001         | 2.72                 | 1.47, 5.01    | 0.001          |
| Preeclampsia                                        | 85 (30.9%)              | 340 (34.0%)             | 2.87                 | 1.70, 4.85    | <0.001         | 2.73                 | 1.51, 4.93    | 0.001          |
| Gestational hypertension                            | 19 (6.9%)               | 218 (21.8%)             | <i>Reference</i>     |               |                | <i>Reference</i>     |               |                |
| <b>Pregnancy Characteristics</b>                    |                         |                         |                      |               |                |                      |               |                |
| Gestational Onset of HDP (weeks)*                   | 33.3 ± 5.0              | 35.0 ± 4.4              | 0.91                 | 0.88, 0.94    | <0.001         | 0.92                 | 0.89, 0.95    | <0.001         |
| Gestational Diabetes                                | 46 (16.7%)              | 173 (17.3%)             | 0.96                 | 0.67, 1.37    | 0.829          | 0.90                 | 0.55, 1.46    | 0.664          |
| <b>Past Medical History</b>                         |                         |                         |                      |               |                |                      |               |                |
| Hypertension                                        | 94 (34.2%)              | 337 (33.7%)             | 1.02                 | 0.77, 1.36    | 0.873          | 0.95                 | 0.65, 1.39    | 0.802          |
| Type 1 DM                                           | 11 (4.0%)               | 27 (2.7%)               | 1.50                 | 0.74, 3.07    | 0.263          | 1.45                 | 0.56, 3.73    | 0.446          |
| Type 2 DM                                           | 24 (8.7%)               | 86 (8.6%)               | 1.02                 | 0.63, 1.63    | 0.943          | 0.88                 | 0.47, 1.66    | 0.701          |
| Prediabetes                                         | 9 (3.3%)                | 44 (4.4%)               | 0.74                 | 0.35, 1.53    | 0.410          | 0.54                 | 0.22, 1.32    | 0.176          |
| Renal Disease                                       | 9 (3.3%)                | 18 (1.8%)               | 1.85                 | 0.82, 4.16    | 0.138          | 1.41                 | 0.54, 3.65    | 0.481          |

\*Data only available in N = 1033. ^Adjusted analysis was conducted in the N = 1033 with gestational onset of HDP data available
